# Supplementary material for: Impact of a Whey Protein Hydrolysate Treated by Electrodialysis with Ultrafiltration Membrane on the Development of Metabolic Syndrome and the Modulation of Gut Microbiota in Mice
Source: MDPI journal article supplement (doi:10.3390/ijms241612968), 2023-08-19
Supplement: s1 [file s1]

Table S1. Major peptides recovered in F3, characteristics, associated bioactivities and relative abundance (in %) versus initial content in F1 (in %) (adapted from [11,31,32,63-65]).

| Peptide sequence | Observed mass (Da) | Retention time (min) | Net charge at pH7 | Peptide source | Associated bioactivities                             | Relative abundance in F3 | Relative abundance in F1 |
|------------------|--------------------|----------------------|-------------------|----------------|------------------------------------------------------|--------------------------|--------------------------|
| VY               | 280.14             | 2.5                  | 0                 | β-lg (41-42)   | ACE inhibitor                                        | 3.75±1.25                | 2.43±0.48                |
| ILDK             | 487.30             | 2.8                  | 0                 | α-la (95-98)   | Calcium binding                                      | 4.95±0.41                | 4.52±0.80                |
| +AEK             | 346.15             |                      | 0                 | β-lg (73-75)   | ACE inhibitor                                        |                          |                          |
| + IIAEK          | 572.35             |                      | 0                 | β-lg (71-75)   | ACE inhibitor, DPP-IV inhibitor, Hypocholesterolemic |                          |                          |
| DAQSAPLR         | 856.44             | 4.04                 | 0                 | β-lg (33-40)   | ACE inhibitor                                        | 3.53±0.26                | 3.43±0.19                |
| IVTQTMK          | 819.45             | 4.4                  | 1                 | β-lg (2-8)     | DPP-IV inhibitor                                     | 1.41±0.11                | 1.14±0.06                |
| IDALNENK         | 915.47             | 5.1                  | -1                | β-lg (84-91)   | ACE inhibitor, DPP-IV inhibitor, Hypocholesterolemic | 0.45±0.00                | 1.43±0.03                |
| GLDIQK           | 672.38             | 5.6                  | 0                 | β-lg (9-14)    | ACE inhibitor                                        | 3.08±0.06                | 3.50±0.04                |
| ALPMHIR          | 836.47             | 7.91                 | 1.1               | β-lg (142-148) | ACE inhibitor, Antioxidant                           | 1.66±0.14                | 0.22±0.00                |
| +PMHIR           | 656.35             |                      | 1.1               | β-lg (144-148) | ACE inhibitor                                        |                          |                          |
| LIVTQTMK         | 932.54             | 8.26                 | 1                 | β-lg (1-8)     | DPP-IV inhibitor                                     | 5.55±0.28                | 3.88±0.11                |
| ALPM             | 430.22             | 8.63                 | 0                 | β-lg (142-145) | ACE inhibitor                                        | 5.41±0.08                | 3.33±0.42                |
| +VGINY           | 564.29             |                      | 0                 | α-la (99-103)  | Non-reported                                         |                          |                          |
| VLVLDTDYKK       | 1192.67            | 9.32                 | 0                 | β-lg (92-101)  | DPP-IV inhibitor                                     | 0.80±0.05                | 3.14±0.53                |
| VAGTWY           | 695.33             | 10.62                | 0                 | β-lg (15-20)   | ACE inhibitor, DPP-IV inhibitor, Antioxidant-ORAC    | 28.04±0.65               | 13.26±0.35               |
| VLVLDTDYK        | 1064.57            | 11.25                | -1                | β-lg (92-100)  | ACE inhibitor                                        | 1.02±0.17                | 2.55±0.31                |
| TKIPAVF          | 774.46             | 12.27                | 1                 | β-lg (76-82)   | Antibacterial                                        | 5.94±0.36                | 2.61±0.23                |
| IPAVF            | 545.32             | 13.37                | 0                 | β-lg (78-82)   | ACE inhibitor, DPP-IV inhibitor                      | 10.79±0.17               | 3.78±0.13                |
| YLLF             | 554.31             | 17.08                | 0                 | β-lg (102-105) | ACE inhibitor                                        | 3.77±0.23                | 1.98±0.28                |

β-lg : β-lactoglobulin, α-la: α-lactalbumin, WPH: whey protein hydrolysate

## Electrodialytic Cells

### *1) Electrodialysis with ultrafiltration membranes for peptide recovery*

The EDUF experiments were carried out using an industrial unit fabricated by Eurodia Industrie SAS (Pertuis, France), with an effective surface of 560 cm<sup>2</sup> and configured to recover positively charged peptides. The cell configuration used was first developed by Geoffroy et al. 2022 [46] to overcome some technological limitations. Thereby, as described in detail by Geoffroy et al. 2022 [46], the cell was composed of cation-exchange membranes (CEMs) (Astom, Tokyo, Japan), anion-exchange membranes (AEMs) (Astom, Tokyo, Japan) and UF membranes (Synder, Vacaville, CA, USA) stacked between two dimensionally stable electrodes (DSE).

### *2) Conventional electrodialysis for demineralization*

The initial WPH (F1), final WPH (F2) and peptide recovery fraction (F3) were demineralized using a MP type cell (ElectroCell AB, Täby, Sweden). The anode was a dimensionally stable electrode (DSA-O<sub>2</sub>), and the cathode was a food-grade stainless steel electrode. During treatment, all solutions were circulating through three closed loops connected to reservoirs, pumps (Baldor Electric Company, Fort Smith, AR, USA) and flowmeters (Blue-White Industries Ltd., San Diego, CA, USA) [11].
